# Supplementary material for: Synthesis and biological evaluation of copper(ii) pyrenethiosemicarbazone
Source: Royal Society of Chemistry journal article supplement (doi:10.1039/c5ra00020c), 2015-01-01
Supplement: c5ra00020c1.pdf [file c5ra00020c1.pdf]

## Synthesis and Biological Evaluation of Copper(II)

### Pyrenethiosemicarbazone

Suwarna A. Ingle, Anup N. Kate,<sup>a</sup> Anupa A. Kumbhar,\* Ayesha A. Khan, Soniya S. Rao and

Shridhar P. Gejji

Department of Chemistry, Savitribai Phule Pune University, Pune-411007, India.

### Supporting Information

#### Figure Captions:

**Fig. S1** Changes in the electronic absorption spectra of (A) PyTSC and (B) CuPyTSC (20  $\mu\text{M}$ ) with increasing concentrations (0-300  $\mu\text{M}$ ) of CT-DNA (phosphate buffer, pH 7.2); the inset shows a fitting of the absorbance data at 360 nm for PyTSC and CuPyTSC used to obtain the binding constants.

**Fig. S2** Photograph of 1% Agarose gel showing cleavage of plasmid pBR 322 DNA by PyTSC (A) and its copper complex (B) incubated at 37 °C for 30 min. [DNA] = 200 ng, (A) Lane 1 DNA control, Lanes 2-6, DNA + 10, 20, 30, 40, 50  $\mu\text{M}$  PyTSC; (B) Lane 1: DNA control, Lanes 2 to 7, DNA + 5, 10, 20, 30, 40, 50  $\mu\text{M}$  CuPyTSC

**Fig. S3** Photograph of 1% Agarose gel showing cleavage of plasmid pBR 322 DNA by PyTSC incubated at 37° C for 30 min followed by irradiation for 60 min. [DNA] = 200 ng, Lane 1 and 8, DNA control; Lanes 2-7, DNA + 5, 10, 15, 20, 25, 30  $\mu\text{M}$  PyTSC.

**Fig. S4** ESI-mass spectrum of PyTSC.

**Fig. S5** ESI-mass spectrum of CuPyTSC.

**Fig. S6** Frontier orbitals in (a) TSC, (b) Py and (c) PyTSC (isovalue of  $\pm 0.54$  eV). See text for details.

**Fig. S7** Double-log plot to calculate the binding constant and number of binding site(s) for BSA - PyTSC (A) and BSA- CuPyTSC (B) interactions. the formation constant,  $K_a$ , was determined by the slope and number of binding sites from the intercept.

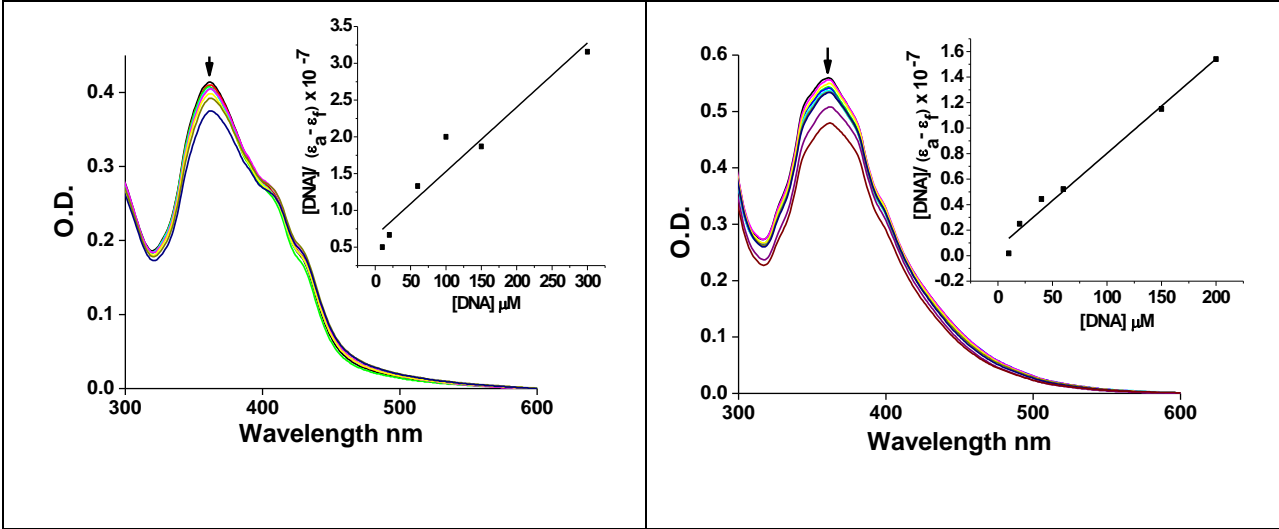

Fig. S1

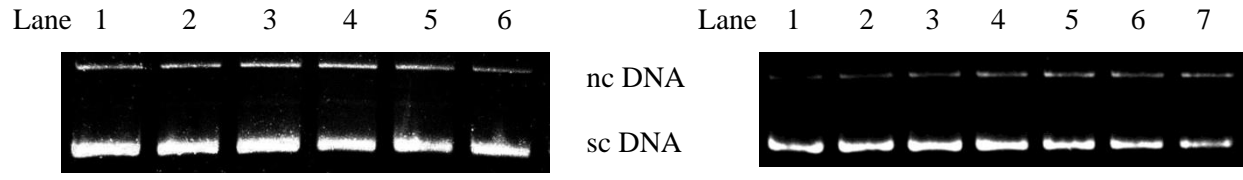

**Fig. S2**

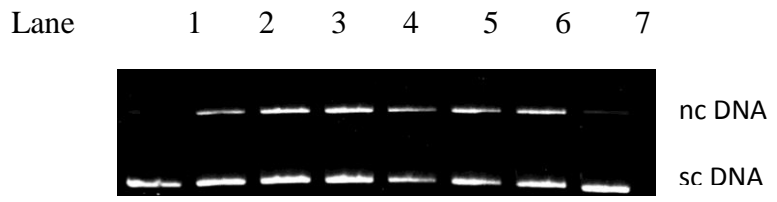

**Fig. S3**

Savitribai Phule Pune University - Central Instrumentation Facility

| Analysis Info                |                                                | Acquisition Date     |           | 10/3/2014 6:18:12 PM |           |
|------------------------------|------------------------------------------------|----------------------|-----------|----------------------|-----------|
| Analysis Name                | D:\Data\DDD_1_Oct_2014\DDD_3_Oct_2014\ANK-05.d | Operator             | CIF       |                      |           |
| Method                       | Pune University Tune_pos_Standard.m            | Instrument           | impact HD | 1819696.00184        |           |
| Sample Name                  | ANK-05                                         | Comment              |           |                      |           |
| <b>Acquisition Parameter</b> |                                                |                      |           |                      |           |
| Source Type                  | ESI                                            | Ion Polarity         | Positive  | Set Nebulizer        | 0.3 Bar   |
| Focus                        | Active                                         | Set Capillary        | 4500 V    | Set Dry Heater       | 200 °C    |
| Scan Begin                   | 50 m/z                                         | Set End Plate Offset | -500 V    | Set Dry Gas          | 4.0 l/min |
| Scan End                     | 1500 m/z                                       | Set Charging Voltage | 2000 V    | Set Divert Valve     | Source    |
|                              |                                                | Set Corona           | 0 nA      | Set APCI Heater      | 0 °C      |

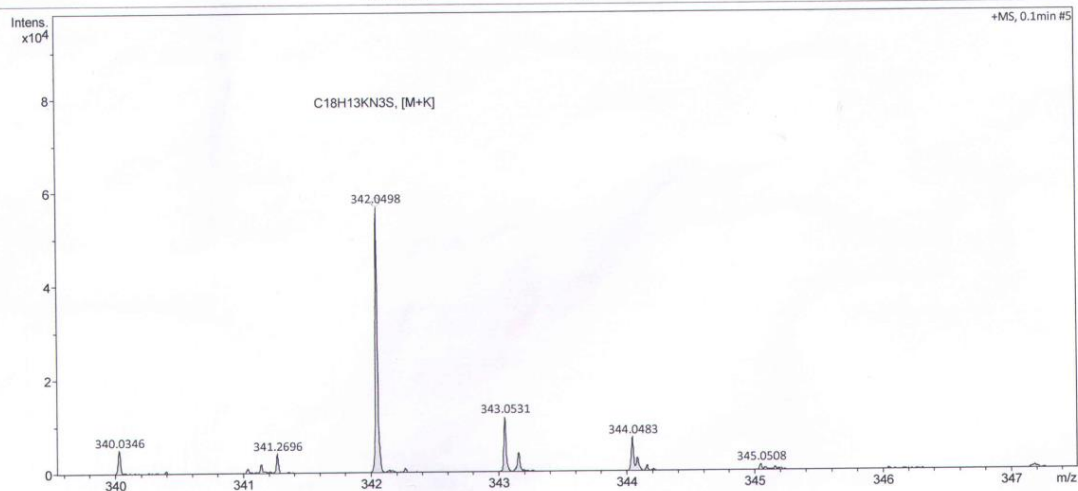

Fig. S4

MSAIF, CDRI LUCKNOW

Original Data Path: 12APR17E5404171499\_160413.RAW  
 Current Data Path: C:\Data2012\APR12\  
 Sample ID: SA13 # 6880A  
 Acquisition Date: 4/17/2012 4:26:58 PM  
 Vial: C:10  
 12APR17E5404171499\_160413 #51-113 RT: 0.80-1.80 AV: 63 SB: 1 0.00 NL: 1.82E6  
 T: + c ESI Full ms [ 100.00-1000.00]

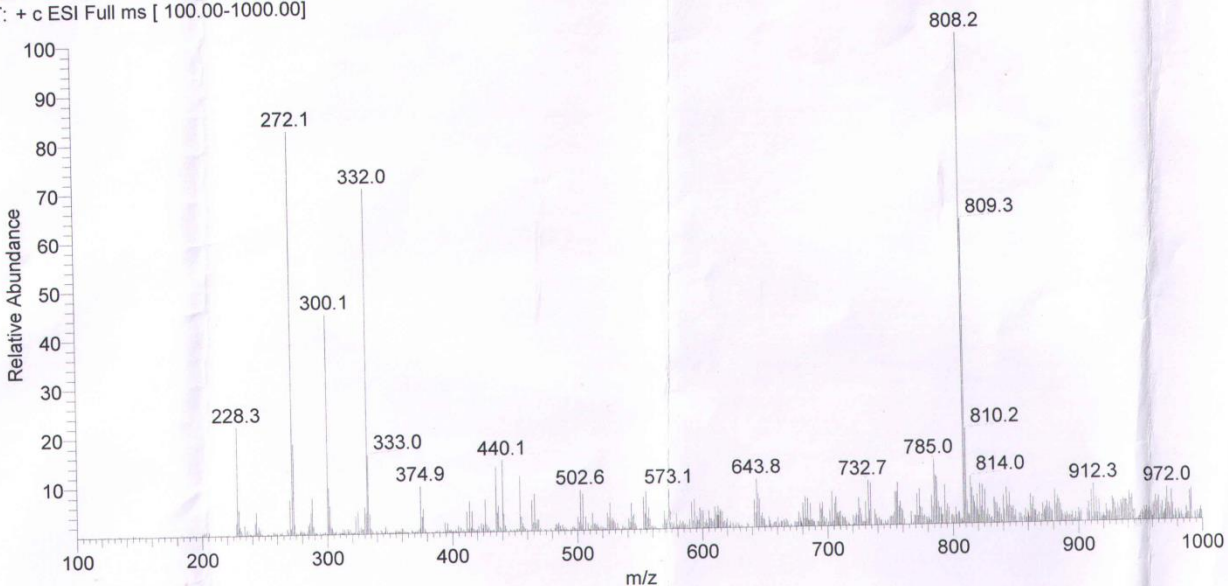

Fig. S5

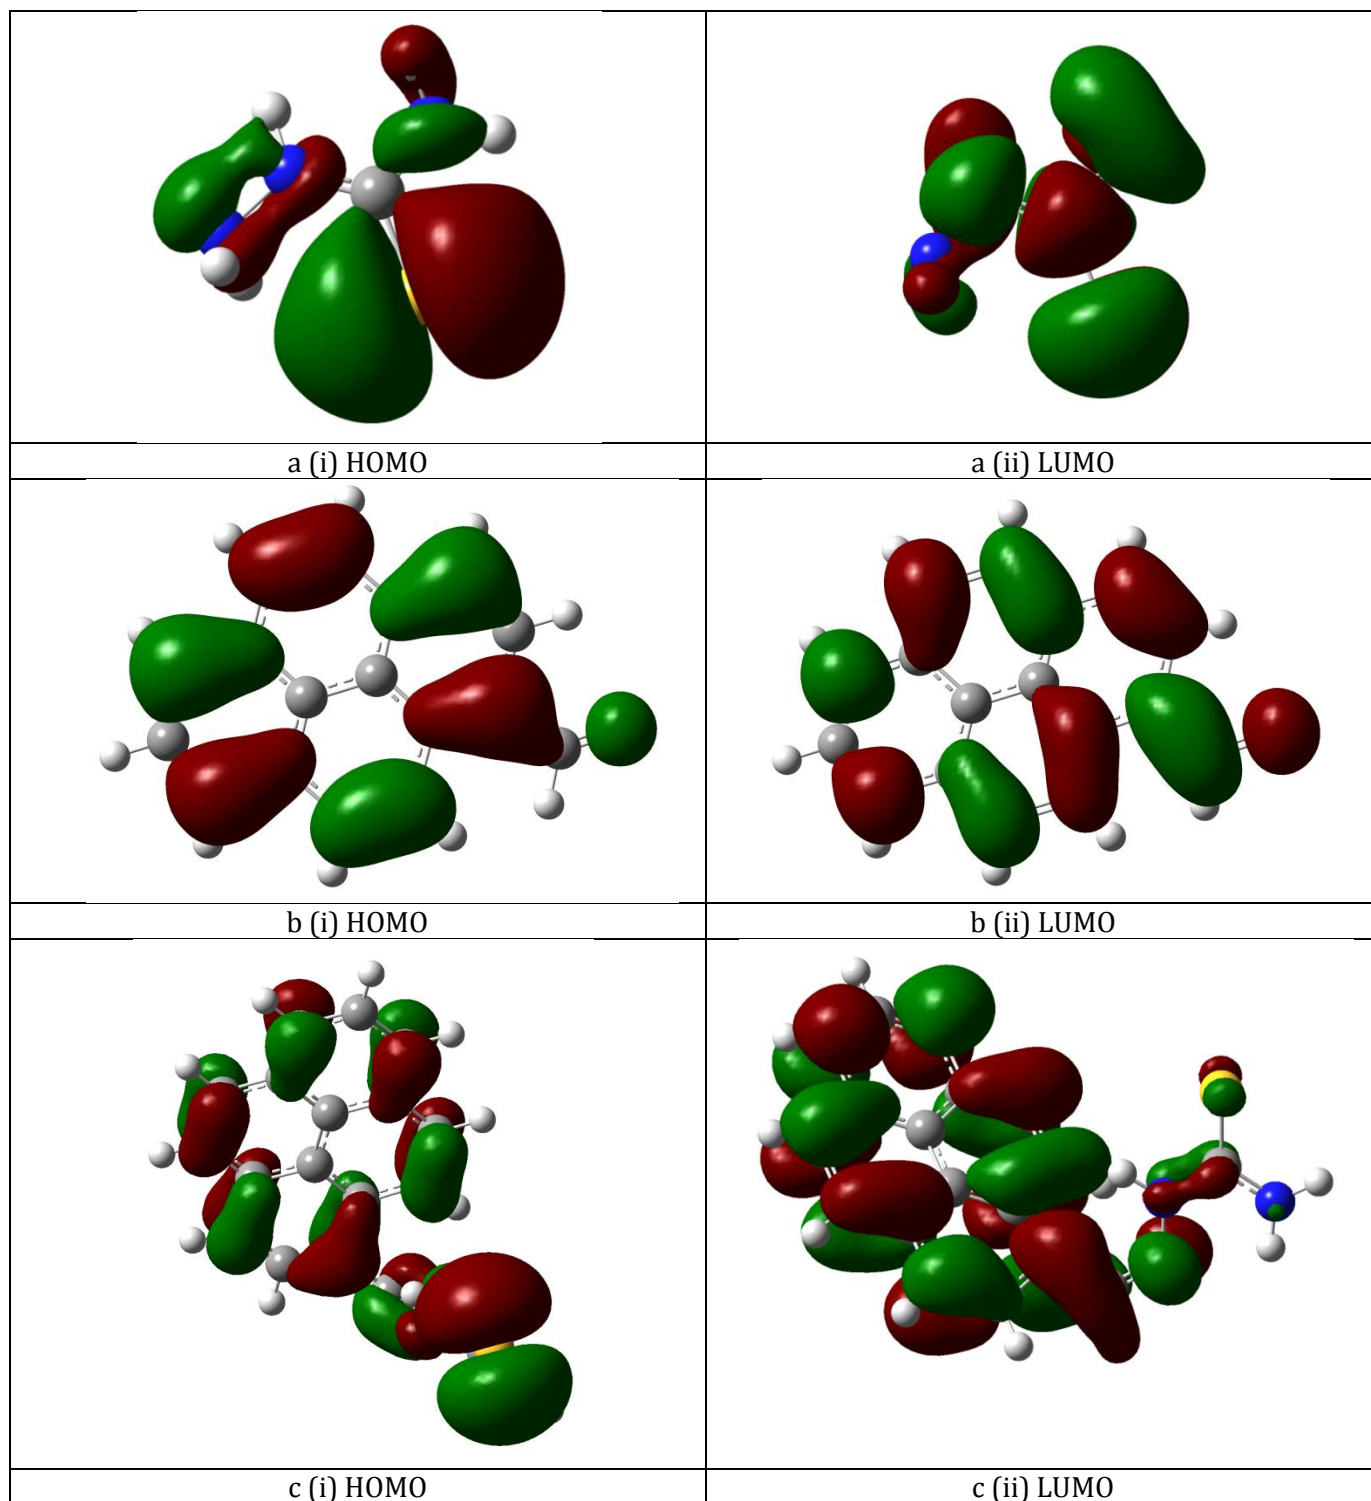

Fig. S6

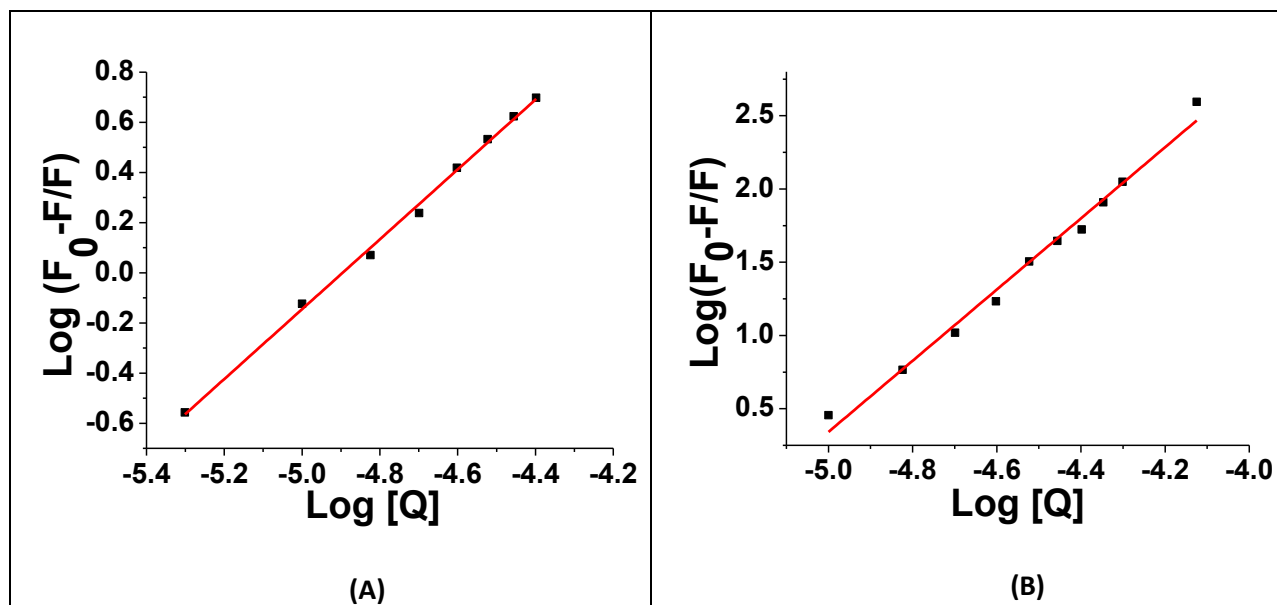

Fig. S7

**Table S1:** Selected bond- distances (in Å) and -angles (in °) of (a) 1-pyrenecarboxaldehyde and (b) 1-pyrenecarboxaldehyde thiosemicarbazone optimized at wB97x/6-31G (d, p).

|                                                   | 1-pyrenecarboxaldehyde | 1-pyrenecarboxaldehyde thiosemicarbazone |
|---------------------------------------------------|------------------------|------------------------------------------|
| C <sub>17</sub> -H <sub>33</sub>                  | 1.112                  | 1.089                                    |
| C <sub>17</sub> -O <sub>10</sub>                  |                        | 1.212                                    |
| C <sub>17</sub> -N <sub>18</sub>                  | 1.280                  |                                          |
| N <sub>19</sub> -H <sub>22</sub>                  | 1.013                  |                                          |
| C <sub>20</sub> -S <sub>21</sub>                  | 1.666                  |                                          |
| H <sub>33</sub> -C <sub>17</sub> -N <sub>18</sub> | 114                    |                                          |
| H <sub>33</sub> -C <sub>17</sub> -O <sub>18</sub> |                        | 119                                      |

**Table S2:** Selected vibrational frequencies ( $\nu$  = Stretching) of 1-pyrenecarboxaldehyde and 1-pyrenecarboxaldehyde thiosemicarbazone.

| Assignments           | 1-pyrenecarboxaldehyde | 1-pyrenecarboxaldehyde thiosemicarbazone |
|-----------------------|------------------------|------------------------------------------|
| $\nu$ C-H             | 2948 (175)             |                                          |
| $\nu$ C=O             | 1849(280)              |                                          |
| $\nu$ NH <sub>2</sub> |                        | 3812(112), 3655(83)                      |
| $\nu$ N-H             |                        | 3626(51)                                 |
| $\nu$ C-N             |                        | 1652(395)                                |



**Table S3:** Electrochemical data for PyTSC and CuPyTSC.

| Compound                                                                      | Oxidation peaks (V) | Assignment                      | Reduction peaks (V)        | Assignment                              | Ref. |
|-------------------------------------------------------------------------------|---------------------|---------------------------------|----------------------------|-----------------------------------------|------|
| 2-Pyrenylacetylene-thiophene(MeCN)                                            | 0.02,0.9            | Irrversible oxidation of pyrene | -2.11,<br>-1.56,<br>-1.81  | One electron reduction of pyrene moiety | 1    |
| 2-Bromo, 5-pyrenylacetylene-thiophene (MeCN)                                  | 0.95,1.07           | -- ” --                         | -1.84,<br>-1.22            | -- ” --                                 | 1    |
| (5-(1-Pyrenylacetylene)-2-thiophene) carboxaldehyde(MeCN)                     | 1.02                | -- ” --                         | -                          | -- ” --                                 | 1    |
| (5-(1-Pyrenylacetylene)-2-thiophene)ethylene Malonitrile                      | 0.48,1.03           | -- ” --                         | -1.64,<br>-1.36,<br>-1.10  | -- ” --                                 | 1    |
| 2-Pyrenylacetylene-thiopheneDicobaltHexacarbonyl (MeCN)                       | 0.56,0.92           | -- ” --                         | -1.91,<br>-1.71            | -- ” --                                 | 1    |
| 2-Bromo, 5-pyrenylacetylene-thiopheneDicobaltHexacarbonyl(MeCN)               | 0.67,0.95, 1.02     | -- ” --                         | -1.07,-<br>1.19,<br>-1.88, | -- ” --                                 | 1    |
| (5-(1-Pyrenylacetylene)-2-thiophene) carboxaldehydeDicobaltHexacarbonyl(MeCN) | 0.56,0.69           | -- ” --                         | -1.48,<br>-1.18,<br>-1.09  | -- ” --                                 | 1    |
| (5-(1-Pyrenylacetylene)-2-thiophene)ethylene MalonitrileDicobaltHexacarbonyl  | 0.92,0.71,          | -- ” --                         | -1.37                      | -- ” --                                 | 1    |

|                                                                    |           |                                       |                          |                                         |              |
|--------------------------------------------------------------------|-----------|---------------------------------------|--------------------------|-----------------------------------------|--------------|
| onyl(MeCN)                                                         | 0.56,0.36 |                                       |                          |                                         |              |
| 2MP<br>([2]metacyclo[2](2,7)pyrenophane) (MeCN)                    | 1.18      | -- ” --                               | -2.41                    | -- ” --                                 | 2            |
| 7P ([7](2,7)pyrenophane) (MeCN)                                    | 1.24      | -- ” --                               | -2.32                    | -- ” --                                 | 2            |
| 4OP (4-oxa[7](2,7)pyrenophane) (MeCN)                              | 1.26      | -- ” --                               | -2.29                    | -- ” --                                 | 2            |
| Pyrene (1:1 MeCN/PhH)                                              | 1.28      | -- ” --                               | -2.16                    | -- ” --                                 | 2            |
| 1Nitro pyre (DMF)                                                  | --        | --                                    | -0.61                    | -- ” --                                 | 3            |
| Buckminsterfullerene Ester (BE1) (THF)                             | --        | --                                    | -0.26                    | Pyrene radical anion                    | 4            |
| Buckminsterfullerene Ester (BE1)(CH <sub>2</sub> Cl <sub>2</sub> ) | 0.89      | Radical cation of pyrene chromophore  | -                        | -                                       | 4            |
| PyTSC (DMF)                                                        | 0.23      | Radical cation of pyrene chromophore  | -1.95,<br>-1.65          | One electron reduction of pyrene moiety | Present Work |
| CuPyTSC (DMF)                                                      | 0.75,0.09 | Metal-based oxidation-reduction peaks | -0.73,<br>-1.1,<br>-1.45 | -- ” --                                 | Present Work |

All potentials are referenced against Ag/AgCl, MeCN = Acetonitrile, DMF = Dimethylformamide, THF = Tetrahydrofuran, PhH = Benzene, CH<sub>2</sub>Cl<sub>2</sub> = Dichloromethane

## References :

1. A. Coleman and M. T. Pryce, *Inorg. Chem.*, 2008, **47**, 10980-10990.
2. R. Y. Lai, J. F. Fleming, B. L. Merner, R. J. Vermeij, G. J. Bodwell, and A. J. Bard, J. *Phys. Chem. A*, 2004, **108**, 376-383.
3. W. A. Lopes, P. D. de Paula Pereira, H. Viertler and J. B. de Andrade, *J. Braz. Chem. Soc.*, 2005, **16**, 1099-1103.
4. T. Gareis, O. Köthe, and J. Daub, *Eur. J. Org. Chem.*, 1998, 1549-1557.
